# Supplementary material
Source: publisher figshare collection journal article supplement (https://tandf.figshare.com/ndownloader/files/13086095)
Supplement: Supplementary file 1 [file 13086095]

	precision	recall	F1
digital	0.285714285714286	0.583333333333333	0.383561643835616
movements	0.571428571428571	0.622222222222222	0.595744680851064
crime	0.452380952380952	0.633333333333333	0.527777777777778
sports	0.6	0.692307692307692	0.642857142857143
culture/arts	0.645833333333333	0.837837837837838	0.729411764705882
foreign politics	0.389830508474576	0.58974358974359	0.469387755102041
conflict	0.306122448979592	1	0.46875
politics	0.571428571428571	0.666666666666667	0.615384615384615
economy	0.731707317073171	0.681818181818182	0.705882352941176
media/tech	0.865979381443299	0.84	0.852791878172589
incidents	0.285714285714286	0.521739130434783	0.369230769230769
food	0.15625	1	0.27027027027027
youth	0.5	0.444444444444444	0.470588235294118
